# Supplementary material for: Association between Daily Sunlight Exposure and Fractures in Older Korean Adults with Osteoporosis: A Nationwide Population-Based Cross-Sectional Study
Source: PubMed Central journal article supplement — Yonsei Med J. 2021 Jun 17;62(7):593–9. doi: 10.3349/ymj.2021.62.7.593 (PMC8236351; doi:10.3349/ymj.2021.62.7.593), 2021-06-17
Supplement: ymj-62-593-s001.pdf [file ymj-62-593-s001.pdf]

**Supplementary Table 1.** Unadjusted and Adjusted ORs (95% CI) of Total Fracture according to Daily Sunlight Exposure Duration and Serum 25-Hydroxyvitamin D Level in Korean Elderly with Osteoporosis from the KNHANES 2008–2011

| Multivariate model                   | Model 1<br>OR (95% CI)              | Model 2<br>OR (95% CI)              | Model 3<br>OR (95% CI)              |
|--------------------------------------|-------------------------------------|-------------------------------------|-------------------------------------|
| Serum 25-hydroxyvitamin D <50 nmol/L |                                     |                                     |                                     |
| Total fracture (n=74)                |                                     |                                     |                                     |
| Sunlight exposure <5 h               | Reference                           | Reference                           | Reference                           |
| Sunlight exposure ≥5 h               | 0.56 (0.24–1.30)<br><i>p</i> =0.175 | 0.58 (0.25–1.37)<br><i>p</i> =0.213 | 0.58 (0.24–1.40)<br><i>p</i> =0.225 |
| Serum 25-hydroxyvitamin D ≥50 nmol/L |                                     |                                     |                                     |
| Total fracture (n = 37)              |                                     |                                     |                                     |
| Sunlight exposure <5 h               | Reference                           | Reference                           | Reference                           |
| Sunlight exposure ≥5 h               | 0.50 (0.23–1.10)<br><i>p</i> =0.086 | 0.49 (0.22–1.09)<br><i>p</i> =0.081 | 0.45 (0.22–0.94)<br><i>p</i> =0.033 |

OR, odds ratio; CI, confidence interval; KNHANES, Korean National Health and Nutrition Examination Survey.

Model 1 was crude. Model 2 was adjusted for age, sex, parental history of osteoporosis diagnosis or fracture, body mass index, bone mineral density of the femoral neck, and serum 25-hydroxyvitamin D. Model 3 was adjusted for current smoking, alcohol intake, and daily calcium intake, physical activity in addition to Model 2's variables.
